1 **Behavioral Phenotyping From deleted CB1 receptors on Cholinergic Neuron**  
2 **Terminals**

3  
4 Wu S<sup>2</sup>, Tsutsui K<sup>2</sup>, Fitoussi AY<sup>1</sup>

5  
6 (1) *The Neuroscience Institute, College of Arts & Sciences, Georgia State University, Atlanta, Georgia,*  
7 *United States.*

8 (2) *University of Maryland School of Medicine, Baltimore, Maryland, United States.*

9

10 *Running title: Discrete working memory enhancement and sustained motivation from deleted*  
11 *CB1r on cholinergic neurons*

12

13 Corresponding author: Dr. Aurelie Fitoussi, The Neuroscience Institute, College of Arts  
14 & Sciences, Georgia State University, Department of Biology, 444 Natural Sciences  
15 Center, 30033 Atlanta, Georgia, United States. [afitoussi33@gmail.com](mailto:afitoussi33@gmail.com).

16

17

18

19 Total Words: 9069

20

21

22

23

24

25

26

27

28

29

30

31

32

33 **Summary**

34

35 Marijuana is the most widely used illicit drug in the Western hemisphere and affects  
36 physiological processes and cognition. Clear deficits are observed in working memory (WM)  
37 that involve the temporary storage and online manipulation of information to solve complex  
38 tasks. Marijuana-induced WM deficits have been ascribed to the primary psychoactive  
39 compound in marijuana,  $\Delta^9$ -tetrahydrocannabinol, which acts at CB1 cannabinoid receptors  
40 (CB1r). Recent work emphasized the role of CB1r and cholinergic interaction across this  
41 cognitive domain without formal anatomical demonstration. We generated mice with a  
42 conditional deletion of CB1r on cholinergic neuron terminals, and WM was evaluated in  
43 operant chambers. Control of physiological variables (temperature, nociception, neuromuscular  
44 function) was also performed, and additional motor, motivation, time estimation behaviors, and  
45 effort-based decision-making. Discrete WM enhancement measured in a novel Delay-Non-  
46 Matching-To-Position task was evidenced that incorporates early acquisition during  
47 randomized delays (mixed procedure), and remarkably, improved performance when these (2s,  
48 8s, 16s, 20s) were kept constant (same procedure) across a testing block of trials. We reported  
49 sustained motivation in an exponential progressive ratio schedule whilst locomotor activity did  
50 not differ between genotypes in the rotarod and open field. However, timing behavior was  
51 modified as indicated by higher discriminated motor responses for the shortest interval in  
52 conditional deleted mice in the Fixed-Interval task (10s, 30s). We reported no effect on effort-  
53 based decision-making. Our work outlines presynaptic CB1r- cholinergic neuron function(s),  
54 and the hippocampus, neocortex, and amygdala brain regions as critical loci through known  
55 basal forebrain efferent projections possibly involved in WM and motivation in marijuana  
56 intoxication.

57

58

59

60

61

62

63

64

65

66

67

68

69

70

71

72 **Introduction**

73

74

75

76

77

78

79

80

81

82

83

84

85

86

87

88

89

90

91

92

93

94

95

96

97

98

99

100

101

102

103

104

105

Marijuana (*cannabis sativa*) intoxication is a complex phenomenon involving many physiological processes that include tachycardia, hypothermia, and analgesia. These properties are mediated by delta-9-tetrahydrocannabinol ( $\Delta^9$ -THC), the (psycho)active constituent of marijuana, which interacts with CB1 receptors in several brain areas (Lupica et al. 2004). Activation of CB1r is well-known to sustain self-administration of the drug, as well as its pleasurable effects, resulting from its action on the reward circuit (Covey et al., 2015). Presynaptic CB1r could centrally induce inhibition of neurotransmitters release via a G-coupled protein also termed depression-induced suppression of inhibition on both excitatory and inhibitory neurons such as the  $\gamma$ -aminobutyric acid (GABA), glutamate and acetylcholine, *a priori* not on dopaminergic (DA) terminals (Zlebnik and Cheer, 2016; Kogan and Mechoulam, 2006). To what extent presynaptic CB1r could shape cholinergic neuronal function is not entirely known.

Short-term memory problems are among the most frequently (additional) self-reported consequences of marijuana use and have been linked to cholinergic system activity. Specifically, temporary information encoding appears to be dramatically impaired (Solowij and Battisti, 2008; Ranganathan and D'Souza, 2006). Both endogenous and exogenous cannabinoid administration impaired working memory (WM) (Zanetti et al., 2011; Pattij et al., 2008; Egerton et al., 2006). Co-infusion of a CB1r antagonist reversed cannabinoid-induced WM deficits (Pattij et al., 2008). More importantly, blocking CB1r alone facilitates subsequent WM performances (Pattij et al., 2008). These effects are thought to mostly arise from disruption of CB1r tone in the hippocampus (HPC) (Egerton et al., 2006), where CB1r are highly expressed and modulate neuronal activity through cholinergic transmission (Hampson et al., 2011) and massive innervation originating from the medial septum (Fitz et al., 2008). This region is a part of the Basal Forebrain (BF) set of nuclei and constitutes the main source of cholinergic neurons (output), together with the brainstem (Ballinger et al., 2016; Newman et al., 2012). BF sends additional important direct efferent projections with presynaptic CB1r to the neocortex and the amygdala, indirectly the striatum, and play a considerable role in attention, and flexibility (Newman et al., 2012), and a possible involvement in modulating emotional and motivational processes as suggested by recent work. However, the functional role of CB1r located on cholinergic neurons in this framework is not yet well-characterized.

Here, we generated mice with a conditional deletion of CB1r on cholinergic terminals by first crossing CB1 floxed to mice expressing *Cre* recombinase in cholinergic neurons, thus

106 resulting in mice lacking CB1r on cholinergic neurons (terminals). Animals were tested in  
107 several tasks including WM evaluation. The latter is usually based on the retrieval of  
108 information across several time duration periods of storage. In the Delay-Non-Matching-To-  
109 Position task (D-NMTP) operant schedule, one of two retractable levers was extended as a  
110 sample. After a delay period, both levers were extended and the animal had to choose the non-  
111 matching lever for reward receipt. Different delay durations, from 0 to 20s, have been tested.  
112 Randomized delays presentation across trials (mixed delays procedure) and fixed delays per  
113 block of trials (same procedure) were performed. Additional tests including spontaneous  
114 alternation in a Y-Maze, interval timing in a fixed-interval time task (2s, 10s, and 30s), primary  
115 cost and reward magnitude discrimination in an effort-based choice schedule, and motivation  
116 in an exponential progressive ratio schedule were performed, aside from the control of  
117 physiological variables including temperature, pain sensitivity in a Hot Plate Test and  
118 neuromuscular function in the Ring Stand and Wire Hang tests, and locomotion in the Rotarod  
119 and Open Field tasks.

120

## 121 **Material and Methods**

122

123 **Animals.** Generation of Chatcre-CB1<sup>-/-</sup> mice. CB1<sup>flox</sup> (CB1<sup>f/f</sup>) mice express two lox sites  
124 flanking the CB1 receptor (CB1r) gene. Chatcre-CB1<sup>-/-</sup> were obtained by crossing CB1<sup>f/f</sup> and  
125 ChaTcre<sup>+/-</sup> mice using a three-step breeding procedure. CB1<sup>f/f</sup> mice were available from  
126 Fisher's Lane Animal Center (FLAC) maintained by the NIAAA-NIH. Chat-cre lines were  
127 available from Dr. Adam Puche Laboratory (University of Maryland). All lines were in a  
128 predominant C57BL/6N background contribution.

129 PCR following tail docking was performed to confirm genotype. Mice were anesthetized with  
130 isoflurane and a 4-mm section of the tail tip was obtained. Kwik Stop powder with benzocaine  
131 was then applied. Animals were returned to their homecages before the bleeding had stopped.  
132 This procedure was performed by the Mouse Consortium directed by Franck Margolis  
133 (University of Maryland).

134 **Housing.** Males mice were used aged from 4 to 8 months. Animals were housed in individual  
135 homecages in a temperature-controlled room (22°C) on a 12-hour light/dark cycle (light on at  
136 7:00 AM). Tests were conducted during the light phase of the cycle. They had free access to  
137 water and were food-deprived (85% ± 2% of free-feeding weight) throughout the experiments  
138 unless stated otherwise. All procedures were conducted in strict accordance with the IACUC  
139 protocol (University of Maryland).

140 **Behavioral tests**

141 *Body temperature*. Body temperature was measured before the Hot Plate Test.

142 *Nociception* (Hot Plate Test). Nociception function (analgesia) was measured using a Hot Plate  
143 analgesia meter. The plate was heated to  $55^{\circ}\text{C} \pm 0.5^{\circ}\text{C}$ . The time for the animal to lick its  
144 forepaw or hind paw was recorded. A cut-off time of the 30s was set to avoid tissue damage.

145 *Catalepsy* (Ring Stand test). Catalepsy was determined using the procedure adapted from  
146 Meschler et al. 2000. Mice were positioned on an 8 cm-diameter ring stand (height 16 cm). The  
147 time the animal was motionless was recorded in a 5-min test session. Mice that either fell or  
148 actively jumped from the ring were allowed five such escapes.

149 *Neuromuscular function* (Wire Hang Test, adapted from Crawley et al. 2000). This test was  
150 conducted as followed: the mouse was placed on a wire cage lid which was gently waved in the  
151 air so that the mouse was able to grip the wire. The lid was then turned upside down,  
152 approximately 15 cm above the surface of the soft bedding material. Latency to fall onto the  
153 bedding was recorded, with a 60s cut-off time.

154 *Locomotion* (Rotarod). A locomotion test was conducted using a cylinder diameter of 31.75 cm  
155 from IITC Life Science. When ready to start testing, the animal was placed onto the non-rotating  
156 rotarod cylinder. Three testing days were performed including three trials a day. Each trial  
157 (ranging from 4 to 40 RPM) lasted 5-min (1 min inter-trial time).

158 *Locomotion* (Open-Field). Animals were free to explore a rectangular white open box as  
159 previously published (Safren et al., 2014), for a single 20-min session. Distance and time  
160 duration on the center were recorded.

161 *Spontaneous alternation* (in a Y-Maze). Each mouse was placed onto the same starting arm and  
162 allowed to freely explore the maze within one 8-min session (from Zanos et al. 2001). The  
163 number of visits and time spent within the three arms were also recorded.

164 *Working memory* (Delay Non-Matching-To-Position, D-NMTP). *Apparatus*. Eight identical  
165 operant chambers (21.6 cm× 17.8 cm×14 cm; Med Associates, St Albans, VT, USA) housed  
166 within sound-attenuating enclosures were used. Each chamber was equipped with two  
167 retractable levers (located 2 cm above the floor) and one LED stimulus light located above each  
168 lever (4.6 cm above the lever). An external food magazine was connected to a dispenser,  
169 centrally located between the two levers, that delivered chocolate-flavored pellets (45 mg, Bio-  
170 Serv, Frenchtown, NJ, USA). A houselight, as well as a white-noise speaker (60-80 dB,  
171 masking noise background), were located on the opposite wall.

172 *Protocol*. Procedures were adapted and modified from previous studies (Nordquist et al., 2008;  
173 Estape and Steckler, 2001). Operant training and acquisition of working memory (rule)

174 consisted of several steps. Animals were first trained in a fixed ratio 1 (FR-1) schedule and each  
175 lever press led to a single food pellet delivery. Criterion was 60 pellets or 40 minutes whichever  
176 came first. After eight sessions, mice were trained in an FR-1 random schedule, both left and  
177 right levers were presented randomly (with the associated top cue-light) so that animals could  
178 selectively alternate both sides. The criterion was similar as compared to the previous step.  
179 After six sessions, animals were trained in the Easy-Sample step wherein sample and non-  
180 matching, choice levers were introduced. Sample lever presentation was randomly alternated  
181 between the right and the left side and signaled by the cue light above it. There was no delay  
182 between the sample and choice levers, and no punishments. However, an inter-trial period (ITI)  
183 of 5 seconds signaled to the animal by the houselight turned off, already separated each trial.  
184 Failure in responding to the sample or non-matching lever within 10s resulted in lever  
185 retraction and was counted as an omission trial. The total number of lever responses was  
186 counted, and the number of correct responses leading to a single food pellet delivery was scored.  
187 Accuracy was defined by the percentage of correct lever responses among total lever responses.  
188 A stable 80% correct performance validated this stage. The Final-Sample schedule was  
189 designated in facilitating working memory non-matching rule acquisition. The incorrect  
190 response led to a time-out period of 5s with the houselight turned off, additionally to the non-  
191 delivery of the reward. After reaching 80% correct responses criterion performance, animals  
192 were required to make a nose-poke between the sample and choice levers under the Non-  
193 Matching-To-Position (NMTP) schedule. In this schedule, after pressing the sample lever  
194 within 10s which was then immediately retracted, a nose-poke performed in the back of the  
195 operant chamber allowed the presentation of both levers. Animals had to choose the non-  
196 matching lever to collect the reward in the food magazine. Priming animal response was  
197 necessary early in the schedule. The session ended after 80 trials or 40 min whichever came  
198 first. Criterion was defined as 75% correct responses for at least three consecutive sessions.  
199 After reaching a stable high level of performance, ITI duration was modified from 5s to 10s,  
200 until reaching the same previous criterion. Failure to make a nose-poke after sample lever press  
201 within 10s or to the non-matching lever (after presentation) within the same aforementioned  
202 time duration was counted as an omission trial and promoted non-impulsive responding. Well-  
203 trained animals made a nose-poke immediately after pressing the sample lever. Data in the  
204 laboratory validated animal responses (nose-poke) in such conditions within 5s (unpublished).  
205 Animals were then evaluated in the Delay-Non-Matching-To-Position (D-NMTP – with 0s)  
206 procedure. This progressive (increasing delays) phase consisted in introducing all the delay  
207 durations, with additional instrumental parameters similar to previously. Importantly, 0s was

208 still a random « delay-like » condition to internally validate the overall schedule. This  
209 methodology was applied to make the animal learn to nose-poke consistently during all the  
210 delay periods. To this end, this protocol was applied and refined from previous studies (see.  
211 Nordquist et al., 2008; Estape and Steckler, 2001) :

- 212 - 2 sessions in DNMTP (0-4s): 0s, 1s, 2s, 4s
- 213 - 2 sessions in DNMTP (0-6s): 0s, 2s, 4, 6s
- 214 - 4 sessions in DNMTP (0-8s): 0s, 2s, 4s, 6s, 8s
- 215 - 9 sessions in DNMTP (0-12s): 0s, 2s, 6s, 8s, 12s
- 216 - 6 sessions in DNMTP (0-16s): 0s, 2s, 8s, 12s, 16s
- 217 - 6 sessions in DNMTP (0-20s): 0s, 2s, 8s, 12s, 20s

218 Delays were randomly introduced during sessions i.e., the *mixed* delays procedure. The latency  
219 between the end of the delay and the first nose-poke leading to lever extension was recorded.  
220 Next, mice were tested in the *same* delay (DNMTP – 0s missing) procedure in which only 2s,  
221 8s, and either 16 or 20s were evaluated sequentially and presented per block of trials, thirty  
222 trials per delay condition, and our session on testing.

223 *Motivation* (exponential progressive ratio schedule). In well-trained mice, animals were  
224 additionally trained with one session of FR-1 and two sessions of FR-5 (5 lever presses resulted  
225 in reward delivery) before the exponential progressive ratio (PR) schedule. Under PR, the  
226 response requirement on the active lever (set in a counterbalanced fashion) increased trial by  
227 trial exponentially as described previously (see. Covey et al., 2016) to earn a reward. After  
228 reward delivery, levers were retracted for 2s before the onset of the next trial and houselight  
229 turned off during this inter-trial time. The maximum number of lever presses provided by the  
230 animal through trials is called the « breakpoint » and was used as a motivational index. For a  
231 detailed sequence of lever ratio implementation, see. Covey et al. 2016. The second batch of  
232 naive animals underwent an operant training schedule as previously published (Hernandez and  
233 Cheer, 2012) and tested in PR as described above.

234 *Temporally control of behavior*, i.e., timing (Fixed interval schedule, FI). In well-trained mice,  
235 animals were additionally trained with one session of FR-1 and two sessions of Fixed Interval  
236 2s (FI-2s) schedule. Under this schedule, trial onset was signaled to the animal by levers  
237 extension, and this was also associated with the starting interval duration (i.e., 2s). Responding  
238 within the interval, in either the active or inactive lever had no instrumental effect (i.e., no food  
239 reward). However, the first response made on the active lever after the end of the interval  
240 resulted in food reward delivery, followed by a 10s-lever retraction period. After two sessions  
241 and stable lever responses provided, animals were switched to FI-10s and FI-30s respectively,

242 under which the interval duration was set from 2s to 10s and 30s, and adapted from previous  
243 work (Oleson et al., 2014). Animals were switched to the FI-10s to FI-30s schedule after  
244 reaching stable performance (i.e., six sessions).

245 *Effort-based decision-making primary ratio.* In well-trained mice, animals were additionally  
246 trained with three to five sessions of FR-1, 60 pellets (validated criterion, three consecutive),  
247 or 40 minutes whichever came first. Then, mice were trained in a forced choices (FC) schedule  
248 wherein the two options that differed in terms of reward magnitude and lever response effort  
249 were presented to the animals, randomly and alternating with both left and right sides. Either  
250 ten lever presses to earn three pellets or one lever press to earn a single food pellet were  
251 available through fifteen trials. The next day, a mixed session with ten forced trials and a  
252 subsequent fifteen free trials were achieved. Finally, choice preference between the two options  
253 was evaluated during twenty-five free trials, and until stable preference for at least two  
254 consecutive sessions was demonstrated (stability was defined as <15% variation between  
255 sessions).

256

## 257 **Data analysis**

258 One/two-way and repeated measures ANOVAs, when required, were performed for genotype  
259 comparisons using dedicated behavioral parameters as mean  $\pm$  sem and using Statistica software  
260 10. F value (group factor) was indicated (significance threshold, 5%,  $p_{\text{value}} < 0.05$ ). Post-hoc  
261 analysis completed variance analysis (for  $p_{\text{value}} < 0.05$ ) using PLSD Fisher (significance  
262 threshold, 5%,  $p_{\text{value}} < 0.05$ ).

263

## 264 **Results**

265

### 266 **Open-field**

267 This test ( $n = 15$ ) that examines exploration patterns revealed no statistical difference in the  
268 total distance traveled (*group*,  $F_{1,15} = 2.78$ , ns), as well as within the session when examining  
269 5-bin minute periods (**figure 2A**). The percentage of time mirrored the distance parameter (data  
270 not shown). Finally, time spent on center was stable during the session, and similar between  
271 both groups (control :  $n = 5$ , experimental :  $n = 10$  ; (*group*,  $F_{1,15} = 1.14$ , ns)).

### 272 **Rotarod**

273 Locomotor activity in this task ( $n = 15$ ) was recorded for three consecutive days, and along  
274 three trials a day (**Figure 2A**). Overall, increase locomotor activity was revealed as illustrated



275 when comparing the first to third day (*day*,  $F_{1,15} = 16.65$ ,  $p < 0.001$ ), but no significant group  
276 difference (control :  $n = 5$  ; experimental :  $n = 10$ ) was observed (*group*,  $F_{1,15} = 3.21$ , ns).

### 277 **Ring Stand and Wire Hang Test**

278 Both tests ( $n = 15$ ) failed to reveal significant differences from CB1r deletion on cholinergic  
279 neurons. As illustrated on **figure 2B**, latency to jump was scored  $16.64 \pm 4.79$  for control ( $n =$   
280  $5$ ) and  $21.79 \pm 2.17$  for genetically-modified mice ( $n = 10$ ) in the Ring Stand Test (*group*,  $F_{1,15}$   
281  $= 1.32$ , ns), and also, see. immobility index on **figure 2B** (*group*,  $F_{1,15} = 5.89$ , ns). On the Wire  
282 Hang Test (*group*,  $F_{1,15} = 2.15$ , ns), latency was scored  $45.25 \pm 8.75$  for control and  $55.24 \pm$   
283  $3.46$  for the conditional knockout mice.

### 284 **Temperature**

285 Conditional knockout ( $n = 5$ ) and control mice ( $n = 10$ ) had the same temperature (*group*,  $F_{1,15}$   
286  $= 6.89$ , ns), with  $36.72 \pm 0.39$  and  $37.19 \pm 0.22$  respectively (**figure 2B**) indicating no significant  
287 alteration from the conditional CB1r deletion.

### 288 **Hot Plate test**

289 We found that both groups ( $n = 15$ ) of mice were sensitive to heat and licked within the same  
290 time interval, for both forepaw (*group*,  $F_{1,15} = 4.54$ , ns) and hindpaw (*group*,  $F_{1,15} = 7.96$ , ns),  
291 as showing on **figure 2B** (control :  $n = 5$  ; experimental :  $n = 10$ ).

### 292 **Y-Maze**

293 This one session measure ( $n = 15$ ) of spontaneous alternation and exploration revealed that  
294 animals displayed the same level of exploratory behavior when examining the percentage of  
295 time spent in the three arms (*group*,  $F_{1,15} = 6.40$ , ns) as compared to the session duration (*group*,  
296  $F_{1,15} = 5.36$ , ns) (data not shown). Detailed analysis failed to extract relevant differences in  
297 terms of arm visits (*group*,  $F_{1,15} = 6.32$ , ns) (**Figure 2B**), or time spent in these arms. For  
298 instance, and as showing on the **figure 2B**, the number of visits in arm 1 (right arm) was scored  
299  $11.40 \pm 0.60$  in control ( $n = 5$ ) and  $10.22 \pm 0.60$  in experimental ( $n = 10$ ) mice (ns). Distance  
300 travelled in arm 1 and adjacent arms did not reveal statistical difference ( $F_{1,15} = 5.78$ , ns) as  
301 indicated in this arm (post-hoc, ns) :  $5571 \text{ mm} \pm 220$  in control and  $5582 \text{ mm} \pm 203$  in  
302 experimental ; arm 2 (post-hoc, ns) :  $6588 \pm 402$  in control and  $6419 \pm 608$  in experimental and  
303 arm 3 (post-hoc, ns) :  $6275 \pm 442$  in control and  $5205 \pm 298$  in experimental.

### 304 **Working memory**

305 This study (control :  $n = 7$  ; experimental :  $n = 6$ ) emphasized the effect of the conditional CB1r  
306 deletion on working memory capacities. First, animals were trained in a fixed ratio 1 and fixed

307 ratio 1, random, as illustrated in **figure 3**. They all acquired this short operant training (FR-1 :  
308 *group*,  $F_{1,13} = 0.51$ , ns ; FR1 rand : *group*,  $F_{1,13} = 2.56$ , ns). Animals performed the Easy Sample  
309 step in which they had to alternate their behavioral response asked by the random alternation  
310 of lever presentation to obtain a single food pellet. Although no time-out (as a penalty) indicated  
311 to the animal that a wrong response was performed, the non-matching rule was already  
312 introduced at this step with no delays and no nose-pokes between the sample and choice phases  
313 (**figure 3**). Both groups acquired the rule and reached more than 80% correct responses (*group*,  
314  $F_{1,13} = 1.45$ , ns). After these sessions, they were on the Final SA schedule that consisted,  
315 essentially, in adding a time-out period (5s) when an incorrect response was provided. After  
316 reaching, similarly, 80% of correct responses (*group*,  $F_{1,13} = 6.59$ , ns), animals were evaluated  
317 in the Non-Matching-To-Position schedule (NMTP) in which making a nose-poke was required  
318 between the sample and choice phases (no delays at this step, **figure 3**). Extension of the levers  
319 was not possible until the animal had made successfully a nose-poke. After reaching equally a  
320 significantly a high number of correct responses, i.e., more than 70% (*group*,  $F_{1,13} = 4.36$ , ns),  
321 animals underwent the specific protocol of progressive delays implementation in the Delay-  
322 Non-Matching-To-Position, D-NMTP (0s, 2s, 4s, 6s, 8s, 12s, 16s, the 20s) (**figure 4**) (see.  
323 Material and Methods section). On this occasion, we revealed significant differences in working  
324 memory acquisition (*group*,  $F_{1,13} = 9.97$ ,  $p < 0.05$ ), that persisted, sometimes sporadically, for  
325 some delays duration, and no significant improvement for 16s (post-hoc, ns) and 20s (post-hoc,  
326 ns). But most of the time, animals reached the same level of performance, see. Three last  
327 sessions 0s (post-hoc, ns), 4s (post-hoc, ns), 12s (post-hoc, ns), 16s (post-hoc, ns) and 20s (post-  
328 hoc, ns) suggesting an improvement in working memory acquisition, rather than performance  
329 *per se* (**figure 4**). Specifically, the longest delays (16s and 20s) durations were found to mask  
330 genotype differences (16s: *group*,  $F_{1,13} = 5.67$ , ns; 20s: *group*,  $F_{1,13} = 7.10$ , ns) unlike short and  
331 mid-delay durations (*delay*,  $F_{1,13} = 9.18$ ,  $p < 0.05$ ) i.e., 2s ( $p < 0.05$ ), 4s ( $p < 0.05$ ), 6s ( $p < 0.05$ ) and  
332 mostly, 8s ( $p < 0.05$ ) during this mixed delays procedure, when delays were presented  
333 randomly across sessions; and when animals had to nose-poke during the whole delay duration,  
334 with one nose-poke necessary at the end of the delay period to induce levers extension. During  
335 this progressive operant schedule, correct responses (**figure 5**) were higher in the conditional  
336 knockout mice (*group*,  $F_{1,13} = 9.80$ ,  $p < 0.05$ ) unlike the total number of nose-pokes performed  
337 during the delays (*group*,  $F_{1,13} = 1.30$ , ns). The latter augmented significantly throughout the  
338 progressive schedule implementation, see. session 1 (>50) vs. session 30 (>1000) (**figure 5A**).  
339 Mean latency between the end of the delay period and the first nose-poke leading to lever  
340 extension was scored inferior to 2s early in this training schedule (see. two first sessions),

341 whereas inferior to 1s late in the procedure, see. two last sessions (data not show, *group*,  $F_{1,13}$   
342 = 6.57, ns). Clear improvement (*general group means correct responses*,  $F_{1,13} = 11.65$ ,  
343  $p < 0.05$  and *interaction group  $\times$  day*, similar) as compared to the control was then, revealed  
344 during the same delays procedure (**figure 5B**), in which the same delay was kept constant  
345 through a block of trials, to lower the cognitive demand and complexity of the task. Only three  
346 delays were presented across sessions, thirty trials per delay condition. Mean latency between  
347 the end of the delay period and the first nose-poke to extend levers was displayed in table 1:  
348 values tend to decrease throughout sessions and reached about half a second for both groups.  
349 In such conditions, improvement in the ChatcreCB1<sup>ff</sup> mice was reported at 2s (*group*,  $F_{1,13} =$   
350 8.89,  $p < 0.05$ ), 8s (*group*,  $F_{1,13} = 16.97$ ,  $p < 0.05$ ), 16s (*group*,  $F_{1,13} = 15.30$ ,  $p = 0.07$ ) and 20s  
351 (*group*,  $F_{1,13} = 13.57$ ,  $p < 0.05$ ).

### 352 **Motivation**

353 We found that ChatcreCB1<sup>ff</sup> mice displayed higher lever presses (*group*,  $F_{1,19} = 11.15$ ,  $p < 0.05$ ;  
354 *interaction group  $\times$  session*, similar), and breakpoint (BP) (*group*,  $F_{1,19} = 13.45$ ,  $p < 0.05$  and  
355 *interaction group  $\times$  session*, similar) in the exponential PR task as measured throughout six  
356 sessions and reaching a stable behavior. Interestingly, either a progressive operant training  
357 under fixed-ratio schedules or consecutive fixed ratio 1 with 10s ITI (data not shown) led to  
358 such higher PR performances in the conditional knockout mice indicating that the operant  
359 assessment of motivation was poorly dependent on the operant training *per se* and strengthened  
360 the effect of the conditional deletion of CB1r. Mean BP value could be approximated to 800  
361 for genetically-modified mice ( $n = 8$ ) and 600 for control ( $n = 11$ ) (**figure 6**). Behavioral  
362 responses on the active lever mirrored the decrease in the number of lever responses on the  
363 inactive lever (**figure 6A**), and no significant difference between both genotypes (see. session  
364 1 and session 6) (*group*,  $F_{1,19} = 1.14$ , ns).

### 365 **Effort-based decision-making**

366 When animals (control:  $n = 10$ ; experimental:  $n = 6$ ) had to choose between either three pellets  
367 but ten lever presses to obtain such a reward, and one pellet but one lever press, all groups chose  
368 the high effort but high magnitude option (*group*,  $F_{1,16} = 2.63$ , ns). The same number of sessions  
369 ( $4 < n < 5$ ) was recorded so that all animals reached stable performance. Here, more than 90%  
370 of choices were directed toward the high effort-high magnitude option, and we found no  
371 statistical difference between the final performance level reached (**figure 6B**).

372

373

### 374 **Fixed-Interval time task**

375 Animals (control:  $n = 10$ ; experimental:  $n = 8$ ) were tested for a fixed interval task in which 2s,  
376 10s, or 30s interval rule failed to lead to food pellet delivery if pressing the lever during the  
377 interval (**figure 7 and figure 8**). Such outcomes could occur after the first lever is pressed at  
378 the end of the designated interval. Lever presses through the interval were however recorded,  
379 and the active lever (left or right side) was assigned in a counterbalanced fashion. We found no  
380 significant differences during the FI-2s for the total number of lever presses (group,  $F_{1,18} = 2.54$ ,  
381 ns). Interestingly, the pattern of lever presses during FI-10s was modified across the six  
382 evaluated sessions (**figure 7A**). The third 2s-bin period was particularly sensitive and a motor  
383 shift was observed so that the highest lever responses were provided during the last 2s-bin  
384 interval. This was more evidenced when examining the non-cumulative lever responses through  
385 the response frequency parameters. No significant difference was reported when examining the  
386 total number of lever presses (group,  $F_{1,18} = 2.58$ , ns), or the total number on the inactive lever  
387 (group,  $F_{1,18} = 3.69$ , ns) unlike the non-cumulated response frequency (group,  $F_{1,18} = 12.54$ ,  
388  $p < 0.05$ ). When normalizing overall locomotor activity and expressing each time epoch as the  
389 percentage of the total locomotor activity, the response curve from both genotypes could be  
390 superposable (data not shown) and selective behavioral variability neglected. At FI-30s, all  
391 parameters were negative (total lever presses : group,  $F_{1,18} = 16.87$ , ns ; lever presses inactive:  
392 group,  $F_{1,18} = 14.78$ , ns; non-cumulated response frequency: group,  $F_{1,18} = 2.54$ , ns) (**figure**  
393 **7B**). All animals acquired and expressed similarly FI-30s rule i.e., preserved timing behavior  
394 (**figure 8**). Animals increased progressively and accurately the number of lever presses to obtain  
395 the reward, with the highest number of responses provided during the two last 6s-bin of interval  
396 achievement duration, similarly for both genotypes.

### 397 398 **Discussion** 399

400 In this study, we aimed at characterizing the role of CB1r specifically localized on  
401 cholinergic neuron terminals that are mostly represented by the efferent acetylcholinergic  
402 projection terminals from the BF and brainstem nuclei (Ballinger et al., 2016; Newman et al.,  
403 2012; Mackie, 2005). To achieve this goal, we generated mice that display conditional deletion  
404 of CB1r on cholinergic neurons (on terminals, see. Gutierrez-Rodriguez A et al., 2017) with  
405 *Cre* enzyme expressed specifically on these cholinergic neuronal populations (see. Material and  
406 Methods section). Additionally for producing conditional deletion of CB1r in the rat brain, *Cre*  
407 expression will allow brain circuit manipulations in targeted neurons with, for instance, light-

408 sensitive channel protein expression, and activation (Tye K et al., 2012), in future relevant  
409 work.

410 We found selective differences in WM abilities as a function of enhanced delay duration.  
411 An exception however occurred at the longest delay(s) suggesting that CB1r-dependent  
412 cholinergic transmission poorly improves performance at the highest holding period duration  
413 along with the complexity of the task. The mixed delays procedure illustrates the predominant  
414 facilitation of WM acquisition in genetically-modified mice, whereas the same delays  
415 procedure demonstrated a discrete enhancement of WM capacity in the same mice. The discrete  
416 effect is consistent with spontaneous alternation (similar) measured in Y-maze in this study.  
417 Additional facilitation in lever responding during working memory acquisition under D-NMTP  
418 schedule changes attributable to the conditional deletion was reported. While fundamental  
419 physiological variables appeared to be well-preserved i.e., temperature, pain threshold, and  
420 neuromuscular function (aside from locomotion) sustained motivation as measured in PR was  
421 revealed unlike primary motor abilities indicating that loss of CB1r on cholinergic neurons is  
422 not enough to cause drastic motor impairment. However, disparate lower primary motor  
423 efficiency in early training could be evidenced in some ChatcreCB1r<sup>fl/fl</sup> cohorts (data not shown).  
424 Failure to reveal improvement in temporary control of behavior as measured in interval timing  
425 completed this preclinical picture, but conditional knockout mice provided higher lever presses  
426 toward the active lever at 10s interval (discriminative responses). Finally, we also reported no  
427 significant effect of the conditional CB1r deletion in a two choices effort-based schedule.

#### 428 **Distribution of both presynaptic CB1r and cholinergic projections in the rat brain** 429 **about cognition**

430 CB1r are found throughout the brain (Devane et al., 1988) with the largest expression  
431 in the hippocampus, the striatum, and the neocortex (Mackie, 2005). These presynaptic  
432 inhibitory receptors inhibit the neurotransmission of both excitatory and inhibitory neurons,  
433 including the acetylcholinergic population (Harkany et al., 2003). This group of neurons  
434 (output) is mainly represented by the basal forebrain (BF) and the brainstem set of nuclei  
435 (Newman et al., 2012; Harkany et al., 2005) that project, essentially with presynaptic CB1r, to  
436 the medial septum (Mesulam et al., 1983), neocortex, hippocampus (Nyiri et al., 1995) and the  
437 amygdala (Ballinger et al., 2016), all of these brain areas predominantly involved in cognition  
438 although additional cholinergic projections have been evidenced to the Ventral Tegmental Area  
439 and the Thalamus for instance (Newman et al., 2012). In this framework, cortical cholinergic

440 projections would constitute a minor component of cholinergic functioning (Newman et al.,  
441 2012).

442 Presynaptic CB1r at terminal fields have been evidenced using *in situ* hybridization, or  
443 autoradiography and immunocytochemistry, outlining the modulation from the  
444 endocannabinoid system (eCB) (Mackie, 2005; Harkany et al., 2003). Additional cholinergic  
445 interneurons could be found in the striatum (aspiny CIN), a small proportion directly in the  
446 neocortex and in the HPC from which cell-type identity is in dispute (Ballinger et al., 2016).  
447 CIN are unlikely to exhibit presynaptic CB1r although the efficient detection of both  
448 acetylcholinergic transferase (Chat) enzyme and CB1r mRNA (i.e., colocalization) could be  
449 discussed (Mackie, 2005; Matsuda et al., 1993).

#### 450 **Working memory, attentional processing, and flexibility**

451 The implication of CB1r specifically expressed on cholinergic neurons in WM was  
452 expected, but whether this deletion could enhance cognitive performance, presumably through  
453 a discrete increase of local ACh tone, remained to be demonstrated. As previously exposed, a  
454 large body of evidence showed that stimulation of CB1r with an agonist impaired WM abilities  
455 while blocking produced the opposite effects (Goonawardena et al., 2010), and was directly  
456 upon the dependence of HPC neuronal firing (Hampson et al., 2011; Hampson and Deadwyler,  
457 2000). Electrical stimulation of this region reversed the deficits and this is accompanied by  
458 changes in neuronal firing (Hampson et al., 2011), through local cholinergic transmission  
459 (Goonawardena et al., 2010). Intra-HPC blocking with cannabinoid antagonist (i.e.,  
460 rimonabant) facilitates WM performances while both *in vitro* and *in vivo* cannabinoid agonists  
461 application in HPC inhibits ACh release (Gessa et al., 1997) suggesting a predominant  
462 implication of CB1r in modulating HPC cholinergic transmission. Further local and systemic  
463 CB1r blockade increased HPC ACh levels, possibly through intra-HPC DA-dependent  
464 mechanisms but not the genetic deletion (Degroot et al., 2006). It favored that long-term  
465 deletion induces large neurobiological compensations, however higher ACh HPC levels could  
466 be evidenced when the region was highly recruited thus, facilitating subsequent cognitive  
467 performances, specifically in learning and memory as demonstrated in CB1r null mutant mice  
468 (Degroot and Nomikos, 2005) and supported by the additional behavioral facilitation scored  
469 under D-NMTP schedule changes in the early-mid acquisition, and discrete WM enhancement  
470 reported in our study. Interestingly, the CB1r agonist applied directly in the medial septum did  
471 not affect ACh levels in the HPC (Degroot et al., 2006). This region provides the main input to  
472 the HPC (Dutar et al., 1995) and septal lesions induced short-term memory impairments (Fitz

473 et al., 2008) although contrasting results have been evidenced (Parent and Baxter, 2004). This  
474 set of data is also consistent with the involvement of HPC and the PFC in flexibility (i.e.,  
475 adapting behavioral responses in changing environment) (Blot et al., 2015) and attentional  
476 processing (Robbins, 2002). Interestingly, mice overexpressing the vesicular acetylcholine  
477 transporter were impaired in short-term WM together with an increase in ACh tone measured  
478 with *in vivo* microdialysis (Kolysnyk et al., 2013). A large array of memory-based deficits was  
479 observed unlike motor improvement indicating that a suboptimal increase in ACh level  
480 produces detrimental cognitive outcomes and could be comparable with some inefficient  
481 cholinergic drugs (Fond et al., 2015), among cholinergic enhancers specifically (Froestl et al.,  
482 2014; Francis et al., 1999). Consequently, improvement in cognitive functions including WM  
483 performances favored a discrete increase in ACh tone or cholinergic excitability in  
484 ChatcreCB1<sup>f/f</sup> mice.

485 Overall, similar spontaneous behavior in Y-maze is consistent with the discrete WM  
486 enhancement observed in DNMT1. Although cognitive evaluation in this task does not yet  
487 reach a consensus regarding conceptual framework, it certainly involves exploration and short-  
488 term memory (exploration: Dudchenko et al., 2004; short-term memory: Zanos et al., 2001;  
489 others: Arendash et al. 2001) and is not sensitive to age-dependent cognitive decline (Arendash  
490 et al., 2001).

491 The abundance of CB1r was also reported within the prefrontal cortex (PFC) (Pattij et  
492 al., 2008), and cannabis exposure induced correlated changes in metabolic activity in this  
493 region, and increase Immediate Early Gene expression (Egerton et al., 2006), cannabinoid-  
494 induced WM improvement is, however, likely to arise from predominant HPC modulation (as  
495 exposed) rather than PFC. Interestingly, regulated feedback could involve the GABAergic  
496 neuronal population and the nucleus accumbens (Mogenson et al., 1983), a region also known  
497 for the emergence and proposed substrate of motivated behaviors (Ko and Wanat, 2016).

#### 498 **Temporally-controlled of behavior**

499 We also reported slight modifications in interval timing behavior, which is coherent  
500 with the effects of nicotine exposure (Daniels et al., 2015; Chen et al., 2006; Meck, 2002) and  
501 cannabinoid drugs (Oleson et al., 2014). Specific interaction of both systems is firstly evidenced  
502 in this study, augmenting overall behavioral responses toward the discriminated rewarding  
503 lever for short intervals (10s) although accuracy *per se* seemed to be preserved. This indicates  
504 that CB1r deletion could, eventually, attenuate cholinergic transmission efficiency but do not  
505 drastically disturb performances in chronically (i.e., genetically) CB1r deleted animals.

506 Consequently, additional pathways or neurotransmitter systems within the PFC (Narayanan et  
507 al., 2012) or striatal DA are better predictors of interval timing capacities (Oleson et al., 2014;  
508 Meck, 2006), but indirect modulation of DA could be involved in ChatcreCB1r<sup>fl/fl</sup> mice as  
509 suggested by previous work.

### 510 **Motivation**

511 Interestingly, we outlined sustained motivation evaluated in a PR task, independently of  
512 primary motor response requirement that points to a role of the eCB system in specifically  
513 modulating cholinergic transmission for emerging emotional and motivational processes.  
514 Preclinical evidence has shown bidirectional crosstalk between nicotinic acetylcholine and eCB  
515 systems in brain reward pathways including the limbic system and the prefrontal cortex  
516 (Zlebnik and Cheer, 2016; Nestler et al., 2001). This is particularly demonstrated in the effects  
517 of eCB on nicotine addiction, and the nicotinic acetylcholinergic system on cannabinoid  
518 dependence (Scherma et al., 2016; Meritt et al., 2008). For instance, the rewarding effect of  
519 nicotine is blunted in CB1 null mutant mice (Castane et al., 2002) and CB1r activation increased  
520 the motivation to self-administer nicotine as measured in the PR task (Gamaledin et al., 2012).  
521 Additionally, CB1r antagonism dose-dependently decreases nicotine self-administration  
522 (Cohen et al., 2002) whilst chronic treatment blocked nicotine-induced DA release in the  
523 nucleus accumbens (Scherma et al., 2016). However, nicotine self-administration would be  
524 rather dependent upon CB1r activation located within the VTA (Simonnet et al., 2013).  
525 Conditional CB1r function on cholinergic neurons is unlikely directly modulate the rewarding  
526 circuit in this framework (Doig et al., 2014) but blocking CB1r alone supported its role in the  
527 hedonic aspect, sensitivity, and pursuit of reward (Friemel et al., 2014; Oleson et al., 2012;  
528 Hernandez and Cheers, 2012; Sanchis-Segura et al., 2004). Blockade of CB1r also increases  
529 DA levels (Tzavara et al., 2003), and stimulation of DA receptors affects ACh release (Day and  
530 Fibigier, 1994) in the neocortex and HPC but not the striatum (the ventral part designated as  
531 the nucleus accumbens and dorsal part) (Degroot et al., 2006; Kofalvi et al., 2005). However,  
532 direct BF efferences that display co-localized CB1r at intra-amygdala terminal sites could  
533 regulate additional mental functions and emotional-related behaviors. The amygdala has been  
534 involved in regulating reward and motivated-related behaviors (Haarts and Izquierdo, 2017;  
535 Leao et al., 2015; Robinson et al., 2014) and exhibits massive interconnections and interrelated  
536 functional relationships with the nucleus accumbens, as well as the prefrontal cortex and the  
537 ventral tegmental area, several crucial brain regions involved in motivational processing (Ko et



538 al., 2016; Wassum et al., 2016) as well as the dorsal striatum: mounting evidence outlined the  
539 role of striatal CIN in motivational functions (Cachope and Cheer, 2014).

540 We also did not report significant differences of the aforementioned deletion in an  
541 effort-based choice schedule when asked decisions were based only upon pellets ratio (1 versus  
542 3) and associated 10 lever presses for the highest reward outcome, or 1 lever press for 1 pellet  
543 delivery. All animals were able to discriminate this high reward-effort ratio that strengthened  
544 sustained motivation (as compared to control) observed in PR.

#### 545 **Implications for neuropsychiatric disorders**

546 Psychiatric disorders including schizophrenia could be manifested by short-term  
547 memory impairments (Lewis et al., 2012), but common antipsychotic (APD) medication  
548 efficiency is minimal across this cognitive domain (Keefe et al., 2012). Pharmacological trials  
549 focused on studies on other drugs beyond APD (Miyamoto et al., 2013), including cannabinoid  
550 treatments from which mechanisms of action have only begun to emerge. Our results outline  
551 promising challenging therapeutical targets regarding cannabinoid compounds activating CB1r  
552 and subsecond modulation of cholinergic release in the HPC to the extended limbic system and  
553 the PFC in particular. Further circuits manipulation using *Cre* expression on cholinergic  
554 neuronal populations exhibiting presynaptic CB1r will delineate restricted pathways and  
555 highlight local neuronal networks for cognitive processing efficiency.

#### 556 **Conclusion**

557 In conclusion, CB1r deficiency on cholinergic neurons induces a predominant discrete  
558 improvement of cognitive performances represented by short-term memory abilities i.e.,  
559 working memory, also uncoupled from motor action *per se* and physiological parameters such  
560 as pain sensitivity and temperature regulation. The sustained motivation was evidenced and  
561 motor bias and temporary delay perception would be poorly involved in such reinforcing  
562 behaviors. However, CB1r deleted animals provided higher motor responses as compared to  
563 the control mice. This array of improvement and selective processes that subserve cognition  
564 emphasizes relevant pharmacological targets and provides novel insights into understanding  
565 eCB function in both normal and pathological states.

566

#### 567 **References**

568  
569 Arendash GW, King DL, Gordon ML, Morgan D, Hatcher JM, Hope CE, Diamond DM (2001)  
570 Progressive, age-related impairments in transgenic mice carrying both mutant amyloid  
571 precursor protein and presenilin-1 transgenes. *Brain Res.* 42-53.

- 572 Ballinger EC, Ananth M, Talmage D, Role LW (2016) Basal forebrain cholinergic circuits and  
573 signaling in cognition and cognitive decline. *Neuron* 91. Sept 21.
- 574 Blot K, Kimura S, Bai J, Kemp A, Manahan Voghan, Giros B, Tzavara E, Otani S (2016)  
575 Modulation of hippocampus-prefrontal cortex synaptic transmission and disruption of  
576 executive cognitive functions by MK-801. *May:25(5): 1348-1361.*
- 577 Cacho R, Cheer JF (2014) Local control of striatal dopamine release. *Front Behav Neurosci.*  
578 *May 23. 8:188.*
- 579 Chen J, Nakamura M, Kawamura T, Takahashi T, Nakahara D (2006) Roles of  
580 pedunclopontine tegmental cholinergic receptors in brain stimulation reward in the rat.  
581 *Psychopharmacology. 184(3-4):514–522.*
- 582 Cohen C, Perrault G, Voltz C, Steinberg R, Soubrie P (2002) SR141716, a central cannabinoid  
583 (CB1) receptor antagonist, blocks the motivational and dopamine-releasing effects of  
584 nicotine in rats. *Behav Pharmacol. 13:451–463.*
- 585 Covey DP, Juliano SA, Garris PA (2013) Amphetamine elicits opposing actions on readily  
586 releasable and reserve pools for dopamine. *Plos One. May 3;(8)5.*
- 587 Covey DP, Wenzel JM, Cheer JF (2015) Cannabinoid modulation of drug reward and the  
588 implications of marijuana legalization. *Brain Res. Dec 2;1628(Pt A):233-43. Epub 2014*  
589 *Nov 25.*
- 590 Daniels CW, Watterson E, Garcia R, Mazur GJ, Brackney RJ, Sanabria F (2015) Revisiting the  
591 effects of nicotine on interval timing. *Behav Brain Res. Ap 15;283:238-250.*
- 592 Degroot A, Nomikos GG (2005) Fluoxetine disrupts the integration of anxiety and aversive  
593 memories. *Neuropsychopharmacology. 30:391–400.*
- 594 Degroot A, Falvi AK, Wade MR, Davis RJ, Rodrigues RJ, Rebola N, Cunha RA, Nomikos GG  
595 (2006) CB1 receptor antagonism increases hippocampal acetylcholine release: site and  
596 mechanism of action. *Mol Pharmacol. Oct; 70(4): 1236-45. Epub 2006 Jul 19.*
- 597 Devane WA, Dysarz FA 3rd, Johnson MR, Melvin LS, Howlett AC (1988) Determination and  
598 characterization of a cannabinoid receptor in rat brain. *Mol Pharmacol. 34:605–613.*
- 599 Dos Santos Coura R, Granon S (2012) Prefrontal neuromodulation by nicotinic receptors for  
600 cognitive processes. *Psychopharm. 221:1-18.*
- 601 Dudchenko PA (2004) An overview of the task used to test working memory in rodents.  
602 *Neurosci Biobehv Rev 28. 699-709.*
- 603 Dutar P, Bassant MH, Senut MC, Lamour Y (1995) The septohippocampal pathway: structure  
604 and function of a central cholinergic system. *Physiol Rev. Apr;75(2):393-427.*
- 605 Egerton A, Allison C, Brett RR, Pratt JA (2006) Cannabinoids and prefrontal cortical function:  
606 insights from preclinical studies. *Neuroscience and Biobehavioral Reviews 30. 680-695.*
- 607 Estape N, Steckler T (2001) Effects of cholinergic manipulation on operant delayed non-  
608 matching to position performance in two inbred strains of mice. *Beh Brain Res. 121:39-*  
609 *55.*
- 610 Fond G, Micoulaud-Franchi JA, Brunel L, Macgregor A, Miot A, Lopez R, Richieri R, Abbar  
611 M, Lancon C, Repentis D (2015) Innovative mechanisms of actions for pharmaceutical  
612 cognitive enhancement: a systematic review. *Psychiatry Res. Sep 30;229(1-2):12-20.*
- 613 Francis PT, Palmer AM, Snape M, Wilcock GK (1999) The cholinergic hypothesis of  
614 Alzheimer's disease: a review of progress. *J Neurol Neurosurg Psychiatry. 66: 137-147.*
- 615 Friemel CM, Zimmer A, Schneider M (2014) The CB1 receptor is an important mediator of  
616 hedonic reward processing. *Neuropsychopharmacology. 39:2387-2396.*
- 617 Froestl W, Muhs A, Pfeifer A (2014) Cognitive enhancers (nootropics). Part 1: drugs interacting  
618 with receptors. *J Alzheimers Dis. 41(4): 961-1019.*
- 619 Fitz NF, Gibbs RB, Jonhson DA (2008) Selective lesion of septal cholinergic neurons in rats  
620 impairs acquisition of delayed matching to position T-maze task by delaying the shift  
621 from a response to a place strategy. *Brain Res Bull. 77:356-370.*

- 622 Gamaledin I, Wertheim C, Zhu AZ, Coen KM, Vemuri K, Makryannis A, Goldberg SR, Le  
623 Foll B (2012) Cannabinoid receptor stimulation increases motivation for nicotine and  
624 nicotine seeking. *Addict Biol* 17:47–61.
- 625 Gessa GL, Mascia MS, Casu MA, Carta G (1997) Inhibition of hippocampal acetylcholine  
626 release by cannabinoids: Reversal by SR 141716A. *Eur J Pharmacol* 327: R1–R2.
- 627 Goonawardena AV, Robinson L, Hampson RE, Riedel G (2010) Cannabinoid and cholinergic  
628 systems interact during the performance of a short-term memory task in the rat. *Learn*  
629 *Mem.* 17:502-511.
- 630 Haarts EE, Izquierdo A (2017) Basolateral amygdala supports the maintenance of value and  
631 effortful choice of a preferred option. *Eur J Neurosci.* Feb;45(3):388-397.
- 632 Hampson RE, Deadwyler SA (2000) Cannabinoids reveal the necessity of hippocampal neural  
633 encoding for short-term memory in rats. *J Neurosci.* Dec 1. 20(23):8932-42.
- 634 Hampson RE, Sweatt AJ, Goonawardena AV, Song D, Chan RHM, Marmarelis VZ, Berger  
635 TW, Deadwyler SA (2011) Memory encoding in hippocampal Ensembles is negatively  
636 influenced by cannabinoid CB1 receptors. *Behav Pharmacol.* 22(4):335-346.
- 637 Harkany T, Hartig W, Berghuis P, Dobszay MB, Zilberter Y, Edwards RH, Mackie K, Ernfors  
638 P (2003) Complementary distribution of type 1 cannabinoid receptors and vesicular  
639 glutamate transporter 3 in basal forebrain suggests input-specific retrograde signaling  
640 by cholinergic neurons. *Eur J Neurosci* 18: 1979–1992.
- 641 Harkany T, Dobszay MB, Cayetanot F, Hartig W, Siegemund T, Aujard F, Mackie K (2005)  
642 Redistribution of CB1 cannabinoid receptors during the evolution of cholinergic basal  
643 forebrain territories and their cortical projection areas: A comparison between the gray  
644 mouse lemur (*Microcebus murinus*, primates) and rat. *Neuroscience* 135: 595–609.
- 645 Hernandez G, Cheer JF (2012) Effect of CB1 receptor blockade on food-reinforced responding  
646 and associated nucleus accumbens neuronal activity in rats. *J Neurosci.* Aug 15;32(33):  
647 11467-77.
- 648 Katona, I, Sperlagh B, Magloczky Z, Santha E, Kofalvi A, Czirjak S, Mackie K, Vizi ES,  
649 Freund TF (2000) GABAergic interneurons are the targets of cannabinoid actions in the  
650 human hippocampus. *Neuroscience* 100:797–804.
- 651 Ko D, Wanat MJ (2016) Phasic dopamine transmission reflects initiation vigor and exerted  
652 effort in an action- and region-specific manner. *J Neurosci.* Feb 17: 36(7): 2202-11.
- 653 Kofalvi A, Rodrigues RJ, Ledent C, Mackie K, Vizi ES, Cunha RA, Sperlagh B (2005)  
654 Involvement of cannabinoid receptors in the regulation of neurotransmitter release in  
655 the rodent striatum: a combined immunochemical and pharmacological analysis. *J*  
656 *Neurosci.* Mar 16: 25(11): 2874-84.
- 657 Kolisnyk B, Guzman MS, Raulic S, Fan J, Maghalaes AC, Feng G, Gros R, Prado VF, Prado  
658 MAM (2013) ChAT-ChR2-EYFP mice have enhanced motor endurance but show  
659 deficits in attention and several additional cognitive domains. *The Journal of*  
660 *Neuroscience.* June 19. 33(29):10427-10438.
- 661 Keefe RSE, Harvey PD (2012) Cognitive impairment in schizophrenia. *Handb Exp. Pharmacol.*  
662 213:11-37.
- 663 Kogan NM, Mechoulam R (2006) The chemistry of endocannabinoids. *J Endocrinol Invest.*  
664 29(3 Suppl) :3-14.
- 665 Leão RM, Cruz FC, Vendruscolo LF, de Guglielmo G, Logrip ML, Planeta CS, Hope BT, Koob  
666 GF, George O (2015) Chronic nicotine activates stress/reward-related brain regions and  
667 facilitates the transition to compulsive alcohol drinking. *J Neurosci.* Apr 15;35(15):  
668 6241-53.
- 669 Lewis DA (2012) Cortical circuit dysfunction and cognitive deficits in schizophrenia-  
670 implications for preemptive interventions. *Eur J Neurosci.* 35(12):1871-1878.

- 671 Lupica CR, Riegel AC, Hoffman AF (2004) Marijuana and cannabinoid regulation of brain  
672 reward circuits. *Br J Pharmacol*. Sep;143(2):227-34. Epub 2004 Aug 16.
- 673 Mackie K (2005) Distribution of cannabinoid receptors in the central and peripheral nervous  
674 system. *Handbook of Experimental Pharmacology*. (168):299-325.
- 675 Matsuda LA, Bonner TI, Lolait SJ (1993) Localization of cannabinoid receptor mRNA in rat  
676 brain. *J Comp Neurol*. Jan 22;327(4):535-50.
- 677 Meck WH (2006) Neuroanatomical localization of an internal clock: a functional link between  
678 mesolimbic, nigrostriatal, and mesocortical dopaminergic systems. *Brain Res*.  
679 1109(1):93–107.
- 680 Meck WH (2002) Choline uptake in the frontal cortex is proportional to the absolute error of a  
681 temporal memory translation constant in mature and aged rats. *Learning and Motivation*.  
682 33(1):88–104.
- 683 Merrit LL, Marton BR, Walters C, Lichtman AH, Imad Damaj M (2008) The endogenous  
684 cannabinoid system modulates nicotine reward and dependence. *J Pharmacol Exp Ther*.  
685 Aug;326(2):483-92.
- 686 Meschler JP, Conley TJ, Howlett AC (2000) Cannabinoid and dopamine interaction in rodent  
687 brain: effects on locomotor activity. *Pharmacol Biochem Behav*. Nov. 67(3):567-73.
- 688 Mesulam MM, Mufson EJ, Levey AI, Wainer BH (1983) Cholinergic innervation of cortex by  
689 the basal forebrain: cytochemistry and cortical connections of the septal area, diagonal  
690 band nuclei, nucleus basalis (substantia innominata), and hypothalamus in the rhesus  
691 monkey. *J Comp Neurol*. 214:170–197.
- 692 Miyamoto S, Jarskog LF, Fleischhacker WW (2013) Alternative pharmacologic targets for the  
693 treatment of schizophrenia: results from phase I and II trials. *Curr Op Psy*. 26(2):158-  
694 165.
- 695 Mogenson GJ, Swanson LW, Wu M (1983) Neural projections from nucleus accumbens to  
696 globus pallidus, substantia innominata, and lateral preoptic-lateral hypothalamic area:  
697 an anatomical and electrophysiological investigation in the rat. *J Neurosci*.  
698 Jan;3(1):189-202.
- 699 Narayanan NS, Land BB, Solder JE, Deisseroth K, DiLeone RJ (2012) Prefrontal D1 dopamine  
700 signaling is required for temporal control. *Proc Natl Acad Sci*. 109:20726–20731.
- 701 Nestler EJ (2001) Molecular basis of long-term plasticity underlying addiction. *Nat Rev*  
702 *Neurosci*. Feb;2(2):119-128.
- 703 Newman EL, Gupta K, Climer JR, Monaghan CK, Hasselmo ME (2012) Cholinergic  
704 modulation of cognitive processing: insights drawn from computational models. *Front*  
705 *Behav Neurosci*. 6:24.
- 706 Nordquist RE, Delenclos M, Ballard TM, Savignac H, Pauly-Evers M, Ozmen L, Spooren W  
707 (2008) Cognitive performance in neurokinin 3 receptor knockout mice. 198(2):211-20.
- 708 Nyiri G, Szabadits E, Cserep C, Mackie K, Shigemoto R, Freund TF (2005) GABA and CB1  
709 cannabinoid receptor expression identifies two types of septal cholinergic neurons. *Eur*  
710 *J Neurosci*. 21:3034–3042.
- 711 Oleson EB, Reckert MV, Morra JT, Lansik CS, Abdullah RA, Loriaux AL, Schettters D, Pattij  
712 T, Roitman MF, Lichtman AH, Cheer JF (2012) Endocannabinoids shape accumbal  
713 encoding of cue-motivated behavior via CB1 receptor activation in the ventral  
714 tegmentum. *Neuron*. Jan 26;73(2):360-73.
- 715 Oleson EB, Cachope R, Fitoussi A, Tsutsui K, Wu S, Gallegos JA, Cheer JF (2014)  
716 Cannabinoid receptor activation shift temporally pattern of dopamine release.  
717 *Neuropsychopharmacology*. 1-12.
- 718 Pattij T, Wiskerke J, Schoffelmeer ANM (2008) cannabinoid modulation of executive  
719 functions. *European Journ Pharmacol*. 585:458-463.

- 720 Ranganathan M, D'Souza DC (2006) The acute effects of cannabinoids on memory in humans:  
721 a review. *Psychopharmacology (Berl)*. Nov. 188(4):425-44. Epub 2006 Sep 26.
- 722 Robbins TW (2002) The 5-choice serial reaction time task: behavioral pharmacology and  
723 functional neurochemistry. *Oct*:163(3-4).
- 724 Robinson MJ, Warlow SM, Berridge KC (2014) Optogenetic excitation of central amygdala  
725 amplifies and narrows incentive motivation to pursue one reward above another. *Dec*  
726 10; 34(50):16567-80.
- 727 Safren N, El Ayadi A, Chang L, Terrillon CE, Gould TD, Boehning DF, Monteiro MJ (2014)  
728 Ubiquitin-1 overexpression increases the lifespan and delays accumulation of  
729 Huntingtin aggregates in the R6/2 model of Huntington's disease. *Plos One*. Jan 27;(9)1.
- 730 Sanchis-Segura C, Cline BH, Marsicano G, Lutz B, Spanagel R (2004) Reduced sensitivity to  
731 reward in CB1 knockout mice. *Psychopharmacology*. 176:233-232.
- 732 Scherma M, Muntoni AL, Melis M, Fattore L, Fadda P, Fratta W, Pistis M (2016) Interactions  
733 between the endocannabinoid and nicotinic cholinergic systems: preclinical evidence  
734 and therapeutic perspectives. *Psychopharmacology (Berlin)* May:223(10):1765-77.
- 735 Solowij N, Battisti R (2008) The chronic effects of cannabis on memory in humans: a review.  
736 *Curr Drug Abuse Rev*. Jan;1(1):81-98.
- 737 Tye KM, Deisseroth K (2012) Optogenetic investigation of neural circuits underlying brain  
738 disease in animal models. *Nat Rev Neurosci*. 13(4):251-66.
- 739 Tzavara ET, Davis RJ, Perry KW, Li X, Salhoff C, Bymaster FP, Witkin JM, Nomikos GG  
740 (2003) The CB1 receptor antagonist SR141716A selectively increases monoaminergic  
741 neurotransmission in the medial prefrontal cortex: implications for therapeutic actions.  
742 *Br J Pharmacol*. Feb; 138(4):544-53.
- 743 Zanos P, Bhat S, Terrillon CE, Smith RJ, Tonelli RH, Gould TD (2016) Sex-dependent  
744 modulation of age-related cognitive decline by the L-type calcium channel gene *ca<sub>v</sub>1*  
745 (*Cav.1.2*). *Eur J Neurosci*. 42(8): 2499-2507.
- 746 Zlebnik NE, Cheer JF (2016) Drug-induced alterations of endocannabinoid-mediated plasticity  
747 in brain reward regions. *J Neurosci*. Oct 5:36(40):10230-10238.
- 748  
749  
750

## 751 LEGENDS

### 752 **Figure 1.** Delay-non-matching-to-position task.

754 Right or left levers are randomly presented during the sample phase. After pressing the sample  
755 lever, a delay phase occurs. In either a mixed or same procedure, the animal nose-poke  
756 constantly during delays, presented either randomly (mixed procedure) or subsequently and  
757 constant per block of trials (same procedure). The nose-poke at the end of the delay period  
758 triggers lever extension. The animal has to choose the opposite lever pressed during the sample  
759 phase to validate a correct trial.

### 760 **Figure 2.** Preserved physiological parameters in *ChatcreCB1<sup>f/f</sup>* mice (experimental, n = 10) and 761 *CB<sup>f/f</sup>* (control, n = 5).

763 (A) Locomotor function evaluated in the open-field (OF) and rotarod. Animals displayed  
764 preserved locomotion in OF i.e., distance traveled (time-course), total distance, time on center

765 (time-course), total time on center, and preserved locomotor ability evaluated in the rotarod as  
766 indicated with the distance traveled through 3 sessions, 3 trials a day. (B) Nociception,  
767 catalepsy, neuromuscular function, and spontaneous alternation behavior. Animals displayed  
768 similar times to lick hinds- and forepaws when heated in the Hot Plate. The Ring Stand test  
769 consisted in evaluating latency and immobility, similarities between genotypes, as well as  
770 temperature ( $^{\circ}$  Celsius). The Wire Hang test consisted in measuring the latency to fall and  
771 revealed preserved motor function. Spontaneous alternation was also preserved as measured in  
772 the one-session Y-maze and the number of arm visits within the 3 available arms. *ANOVA, no*  
773 *significant effect was found.*

774

775 **Figure 3.** Operant training preceding working memory assessment.

776 No genotype difference (experimental:  $n = 7$ ; control:  $n=6$ ) was reported in either (a) fixed ratio  
777 1 and a random version of this step, supported by the session duration (see. mean three last  
778 sessions). Acquisition of the non-matching lever rule started at the next step, the Easy SA  
779 (Sample Alternation) (b) and animals progressively decreased total lever presses, improved  
780 accuracy, and increased correct responses; (c) Correct responses, about 80% was obtained in  
781 the Final SA schedule wherein incorrect response led to a 5s time-out period, and 10s inter-trial  
782 time and (d) Non-Matching-To-Position schedule (NMTP) when a nose-poke was required to  
783 extend levers extension after sample lever presentation. *ANOVA, no significant group*  
784 *difference was found. But session factor was found significant during the Easy SA step,  $*p < 0.05$*   
785 *(total lever presses),  $\#p < 0.05$  (accuracy), &  $p < 0.05$  (correct responses).*

786

787 **Figure 4.** Higher Acquisition and performance in Delay-Non-Matching-To-Position procedure  
788 with mixed delays in genetically-modified animals.

789 Varied delay durations were assessed and progressively implemented through the procedure,  
790 with the percentage of correct responses at 0s, 2s, 4s, 6s, 8s, 12s, 16s, and 20s displayed. WM  
791 assessment was validated for the 3 last sessions of schedules 0-20s in experimental ( $n = 7$ ) and  
792 control ( $n = 6$ ) mice. Otherwise, responses performed were considered as acquisition only.  
793 *ANOVA,  $*p < 0.05$ .* The black frame signaled the test session during the 0-20s schedule with the  
794 black arrow showing the specific testing sessions.

795

796 **Figure 5.** Discrete WM enhancement during the Delay-Non-Matching-To-Position procedure  
797 with mixed delays and same delays.

798 (a) Progressive increase in the correct number of responses per behavioral session revealed a  
799 discrete acquisition improvement in the D-NMTP for the experimental ( $n = 7$ ) versus control  
800 ( $n = 6$ ) group, unlike the total number of nose-pokes made during the delay periods; (b) the  
801 same delays procedure revealed improvement in the experimental group at 2s, 8, 16, the 20s as  
802 compared to control. *ANOVA*,  $*p < 0.05$ ,  $\#p = 0.07$ .

803  
804 **Figure 6.** Exponential progressive ratio and effort-based choice schedule.

805 (A) Sustained motivation (experimental,  $n = 8$ ; control,  $n = 11$ ) as revealed by the higher  
806 breakpoint, and a total number of lever presses unlike the decline of instrumental responses on  
807 the inactive lever. (B) Both genotypes (experimental,  $n = 6$ ; control,  $n = 10$ ) chose preferentially  
808 the high effort-magnitude ratio option, i.e., 10 lever presses for 3 pellets against one lever press  
809 for one pellet in an effort-based choice paradigm. *ANOVA*,  $**p < 0.01$ ,  $*p < 0.05$ .

810  
811 **Figure 7.** Fixed-interval time task.

812 (A) 2s-interval lever presses, 10s-interval with total lever presses, and lever responses on the  
813 inactive lever revealed a similar pattern of behavioral responses (experimental,  $n = 8$ ; control,  
814  $n = 10$ ) whereas response frequency (non-cumulated) in seconds demonstrated higher lever  
815 responses for the genetically-modified mice. The detailed pattern of lever responses throughout  
816 the 10s-interval was shown with both cumulated responses, and non-cumulated responses  
817 frequency. Shifting responses early in the interval is thought to reflect the learning rule, see.  
818 figure 6 (cumulated and non-cumulated representative behavioral pattern)

819  
820 **Figure 8.** Fixed-Interval time task.

821 The detailed pattern of lever responses throughout the 30s-interval was shown with both  
822 cumulated responses, and non-cumulated responses (experimental,  $n = 8$ ; control,  $n = 10$ ). *This*  
823 *symbol* ° *represents the previous behavioral score (session 1)*. *ANOVA*,  $*p < 0.05$ .

824  
825 **Table 1.** Average latency recorded during the same procedure, WM evaluation.

826 The period between the end of the delay duration and the first nose-poke response was displayed  
827 and showed a decrease in latency throughout sessions with no genotype difference. This  
828 parameter is thought to reflect learning of the task (non-matching rule) independently of  
829 performance during the task (DNMTP).

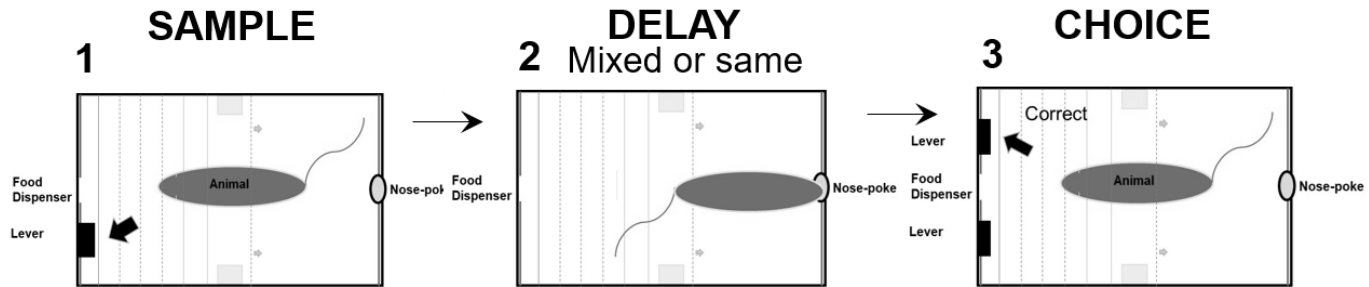



**A**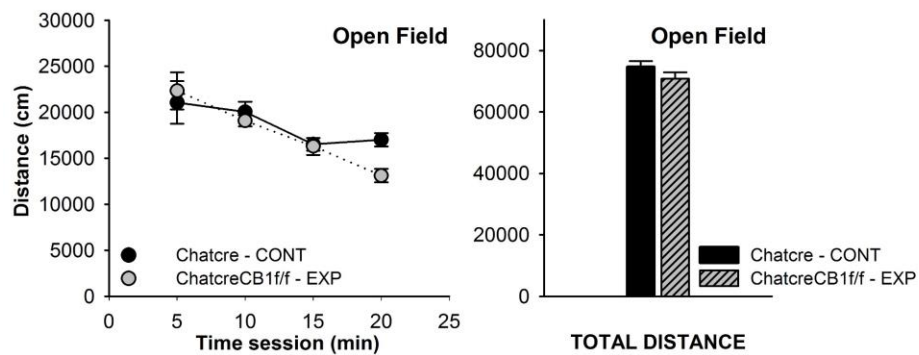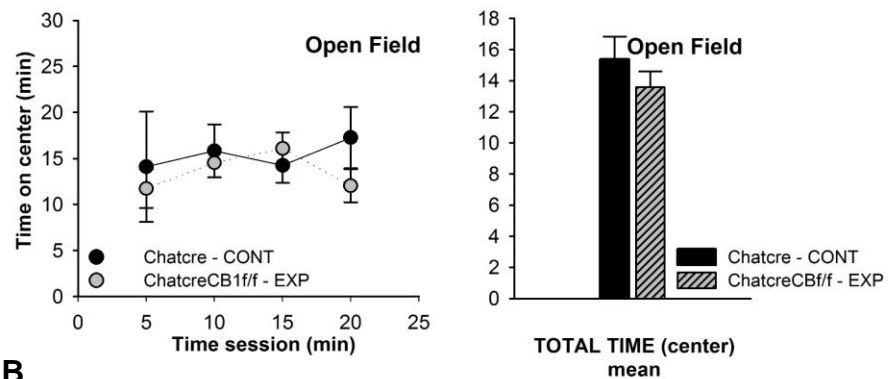**B**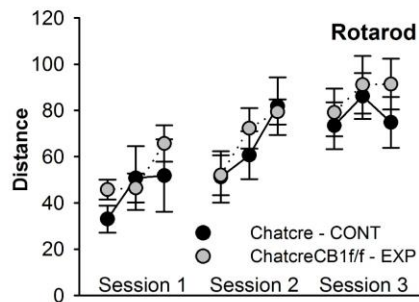**C**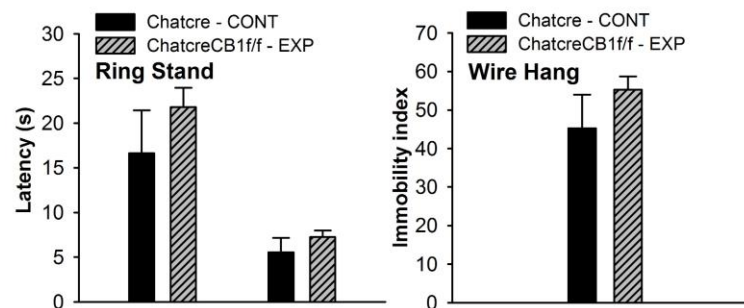**D**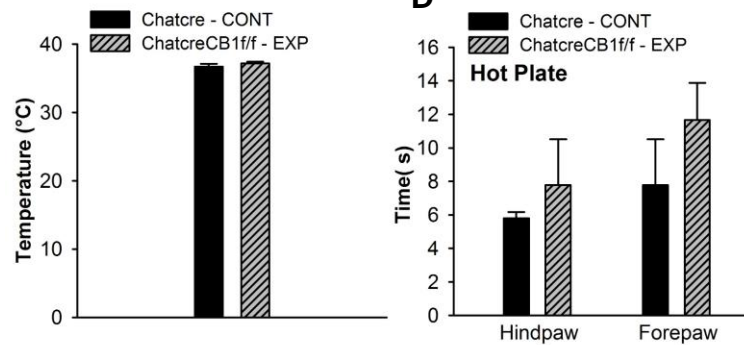**E**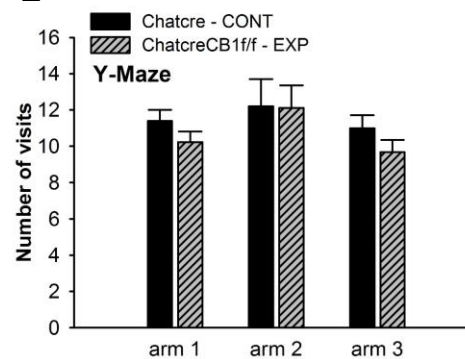

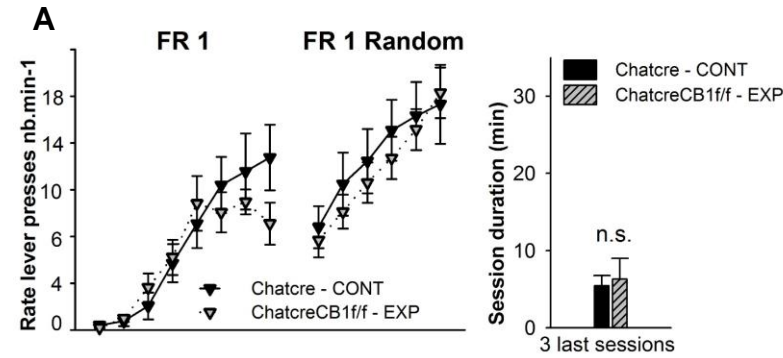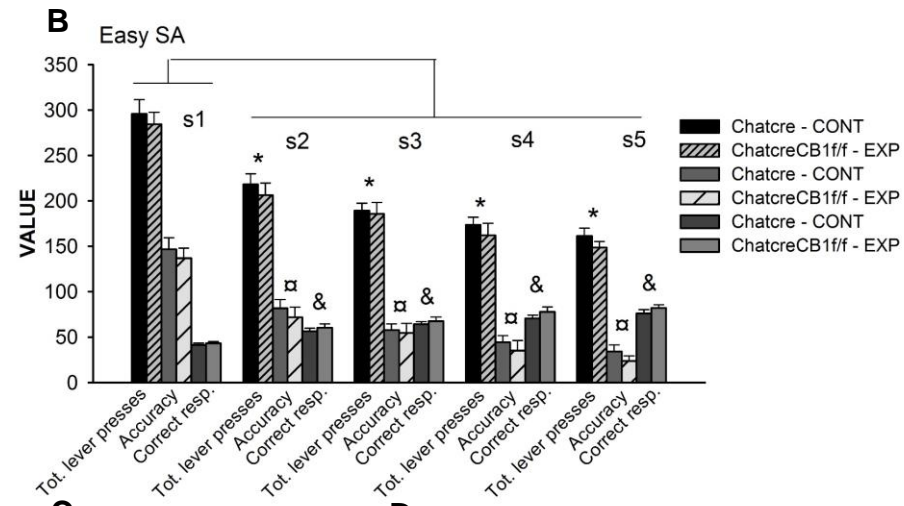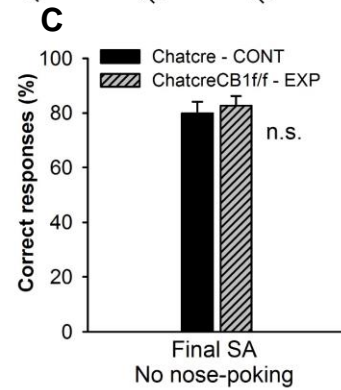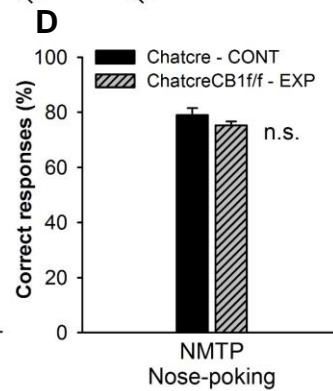

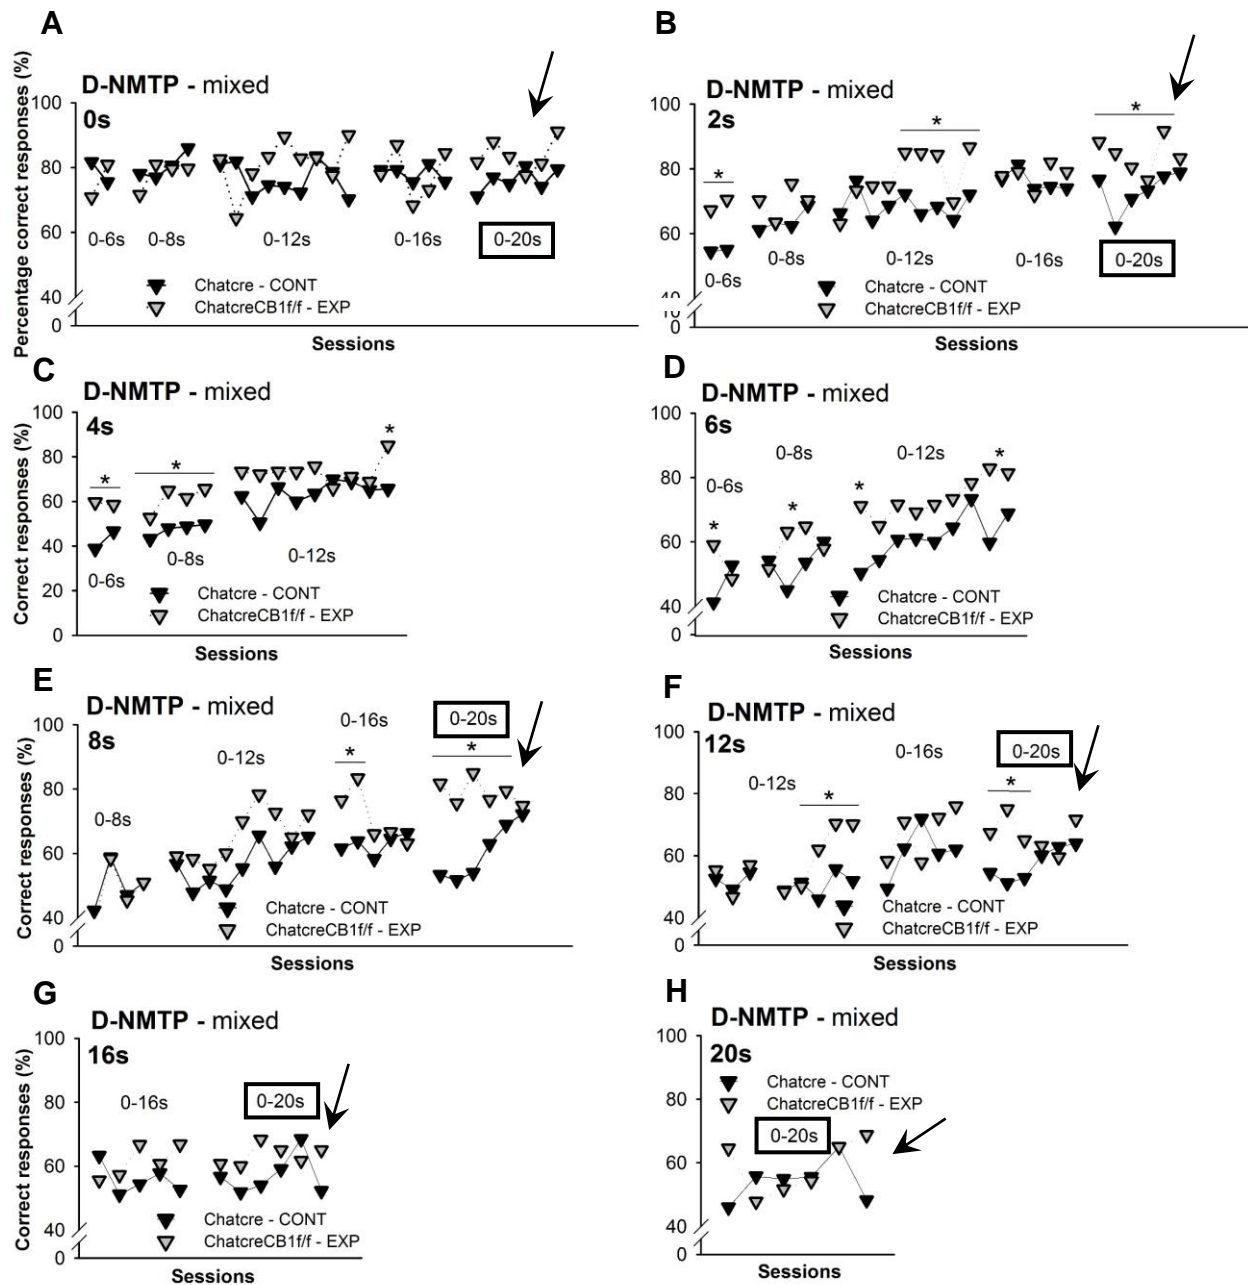

**A**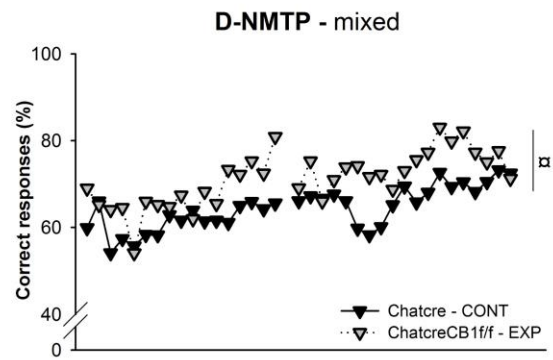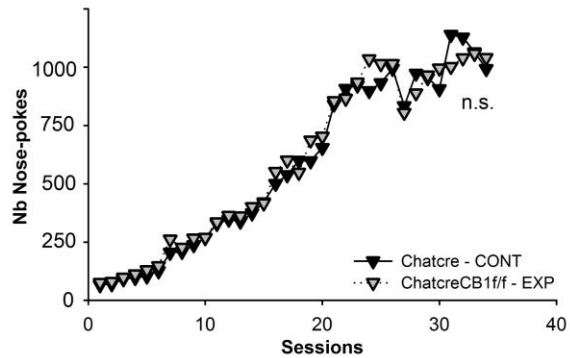**B**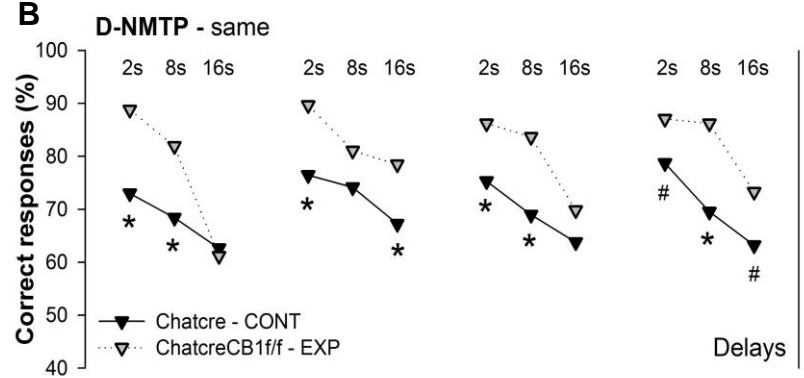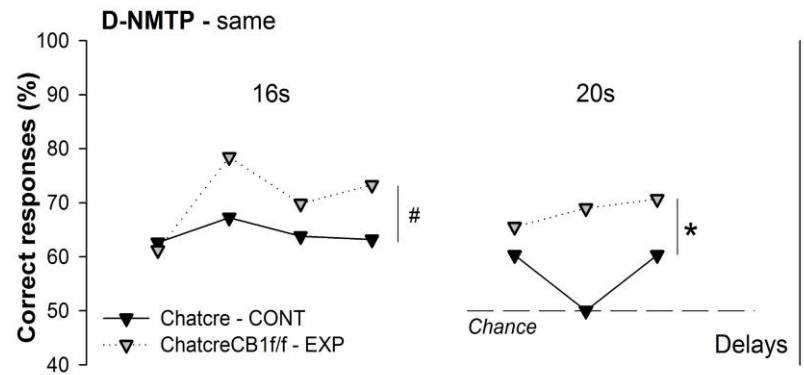

**A**

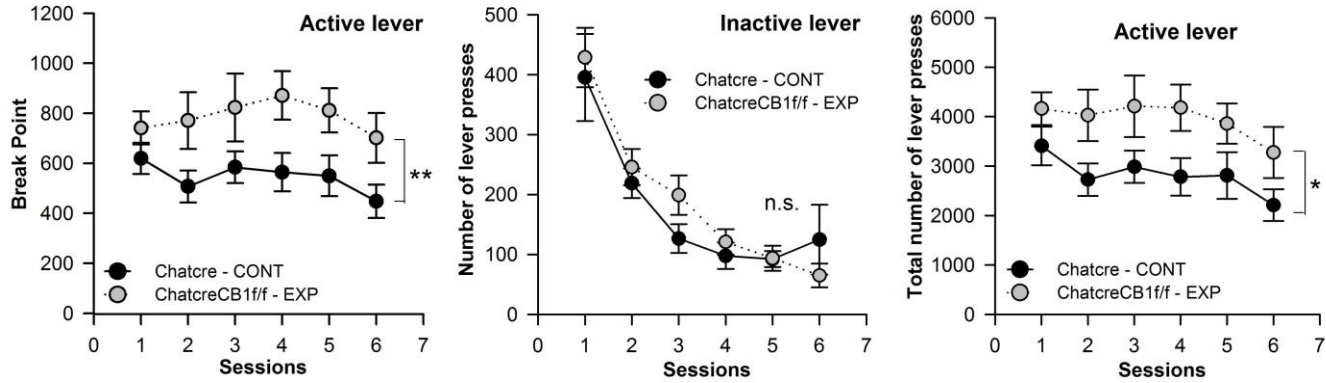

**B**

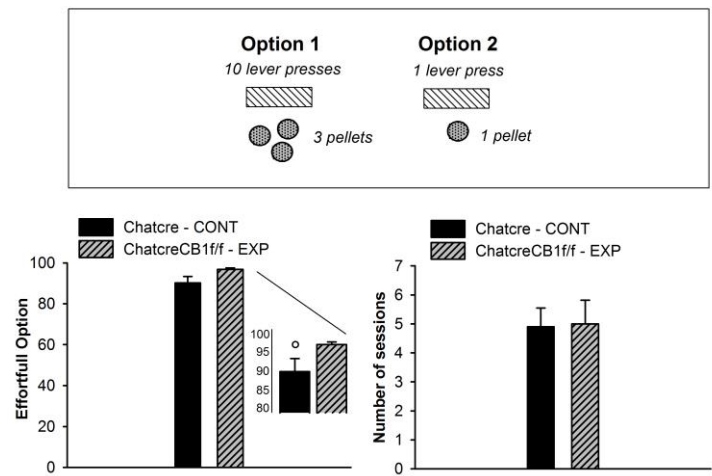

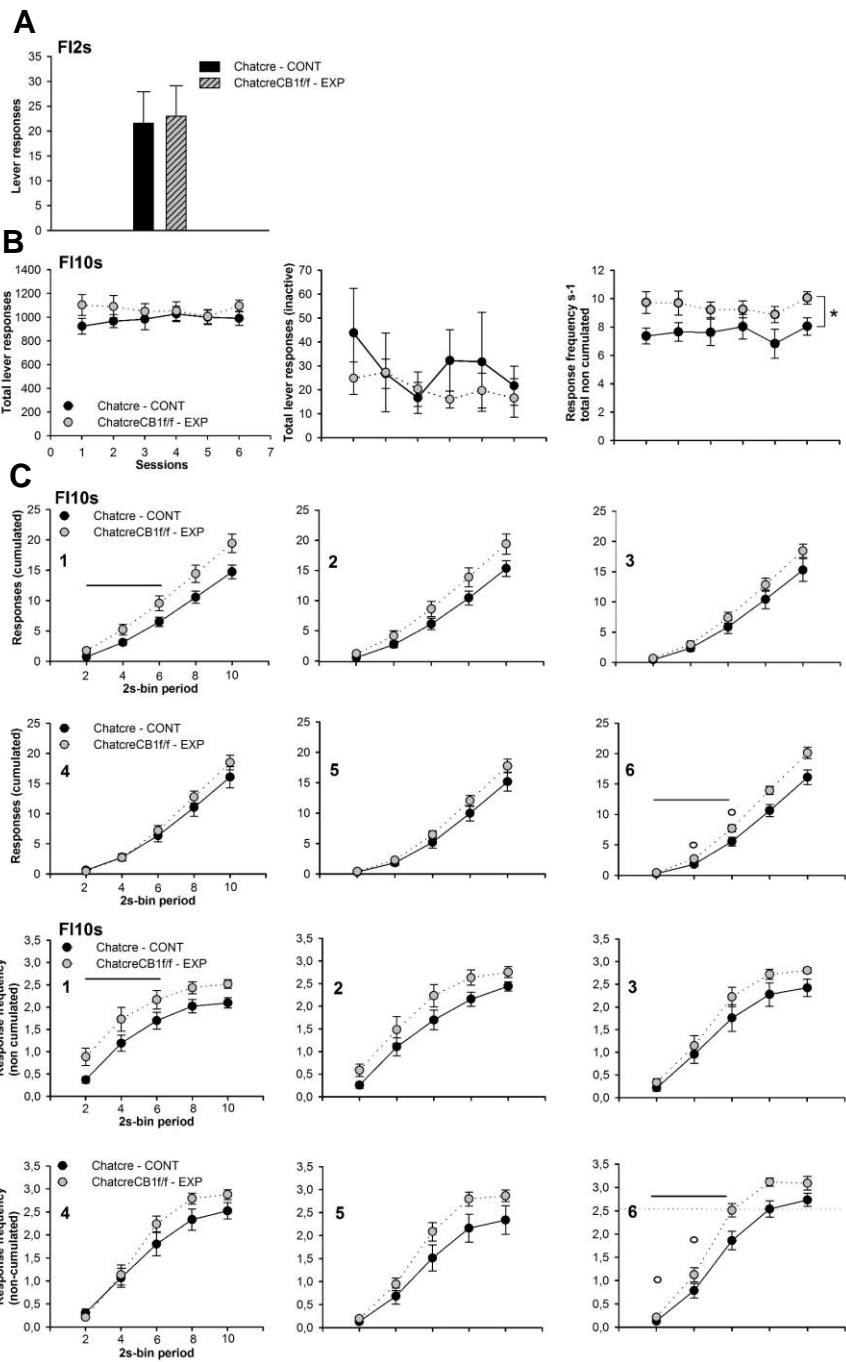

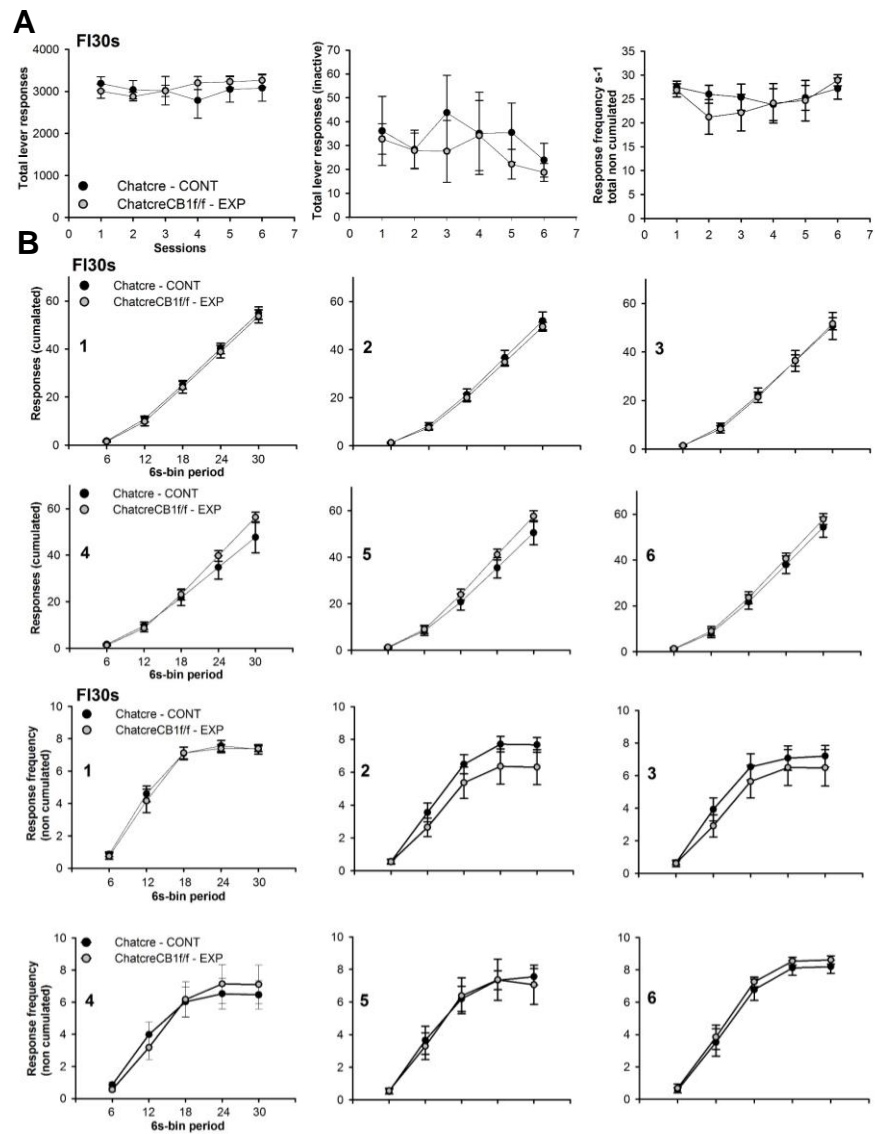

| Same.        | <b>s1</b> |        | <b>s2</b> |        | <b>s3</b> |         | <b>s4</b> |        |
|--------------|-----------|--------|-----------|--------|-----------|---------|-----------|--------|
| EXPERIMENTAL | 0,94      | ± 0,23 | 0,56      | ± 0,13 | 0,50      | ± 0,075 | 0,40      | ± 0,08 |
| CONTROL      | 0,82      | ± 0,24 | 0,70      | ± 0,14 | 0,46      | ± 0,11  | 0,57      | ± 0,05 |
